# Supplementary material
Source: ML conference proceedings conference paper supplement (https://openreview.net/forum?id=dhG6bA25D3)
Supplement: supplementary_material [file attachment]

We have put the code at the Github: <https://github.com/anonymous5929/FedEvalFair>
